# Supplementary material for: Methionine Sulfoxide Reductase B Regulates the Activity of Ascorbate Peroxidase of Banana Fruit
Source: PubMed Central journal article supplement (PMC7922979; doi:10.3390/antiox10020310), 2021-02-18
Supplement: antioxidants-10-00310-s001.pdf [file antioxidants-10-00310-s001.pdf]

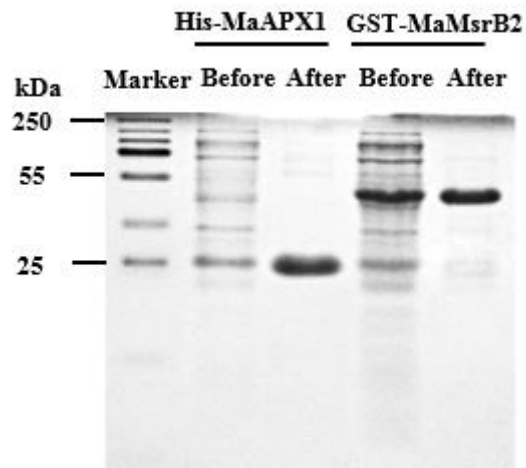

**Figure S1** SDS-PAGE of expressed recombinant His-APX1 protein and GST-MaMsrb2 from *E. coli* BL21. “Before” and “After” referred to before and after protein purification.

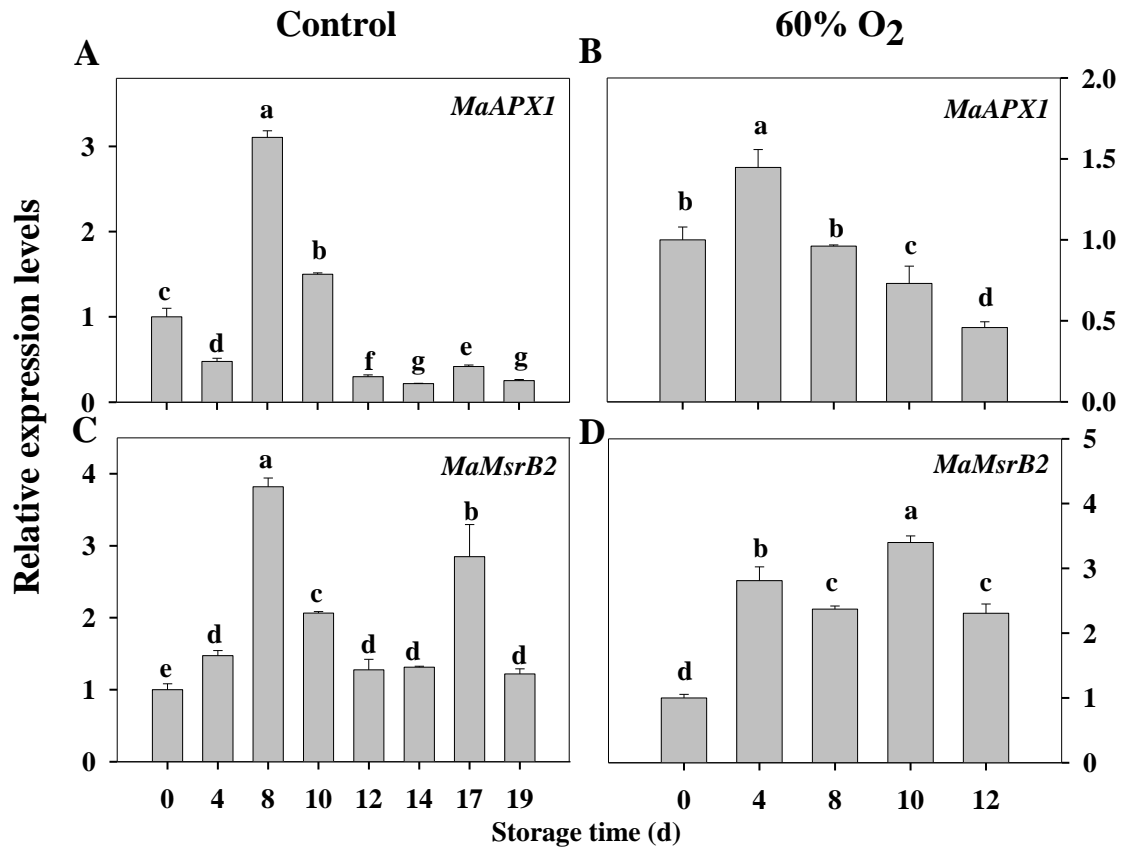

**Figure S2** Expression of *MaAPX1* and *MaMsrB2* genes of banana fruit stored under air (control) or 60% oxygen at 25 °C. (A, C) control fruit. (B, D) fruit stored under 60% oxygen. The expression levels were expressed as a ratio relative to that of 0 d for control fruit, which was set as 1. Each value represents the mean  $\pm$  SE of three biological replicates. Different letters indicated statistically significant differences between the samples (Student's t test;  $P < 0.05$ ).

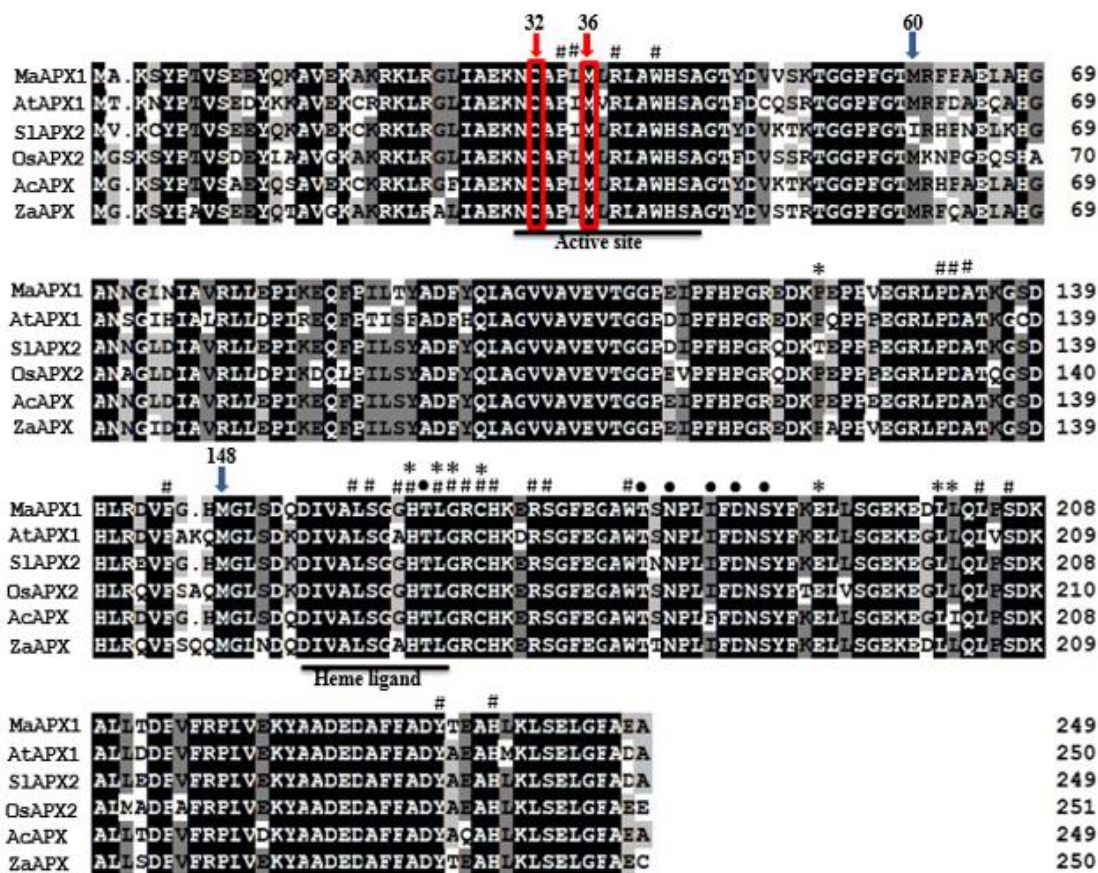

**Figure S3** Multiple alignment of MaAPX1 with AtAPX1 (*Arabidopsis thaliana*, NP\_001030991.2), SlAPX2 (*Solanum lycopersicum*, NP\_001318094.1), OsAPX2 (*Oryza sativa*, XP\_015646556.1), AcAPX (*Ananas comosus*, XP\_020108209.1), ZaAPX (*Zantedeschia aethiopica*, AAC08576.1). #: heme binding site; \*: substrate binding site; ●: K<sup>+</sup> binding site).

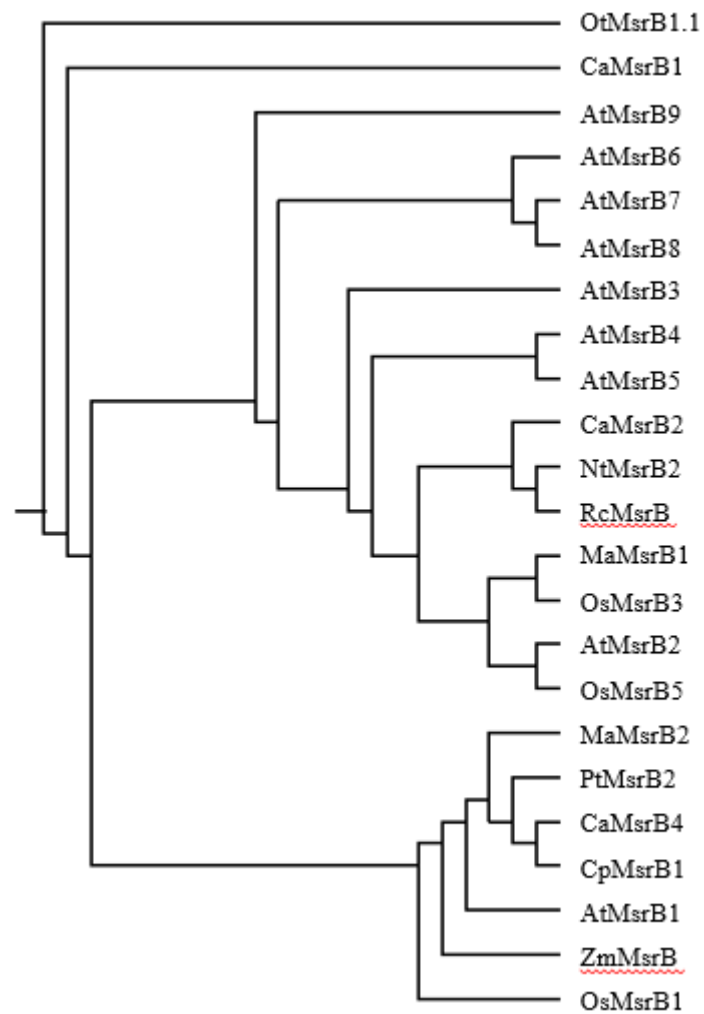

**Figure S4** Phylogenetic alignment of MaMsrB1 and MaMsrB2 with MsrBs from *Arabidopsis thaliana*, *Capsicum annuum*, *Carica papaya*, *Medicago truncatula*, *Oropetium thomaeum*, *Oryza sativa*, *Populus trichocarpa*, *Ricinus communis* and *Zea mays*.

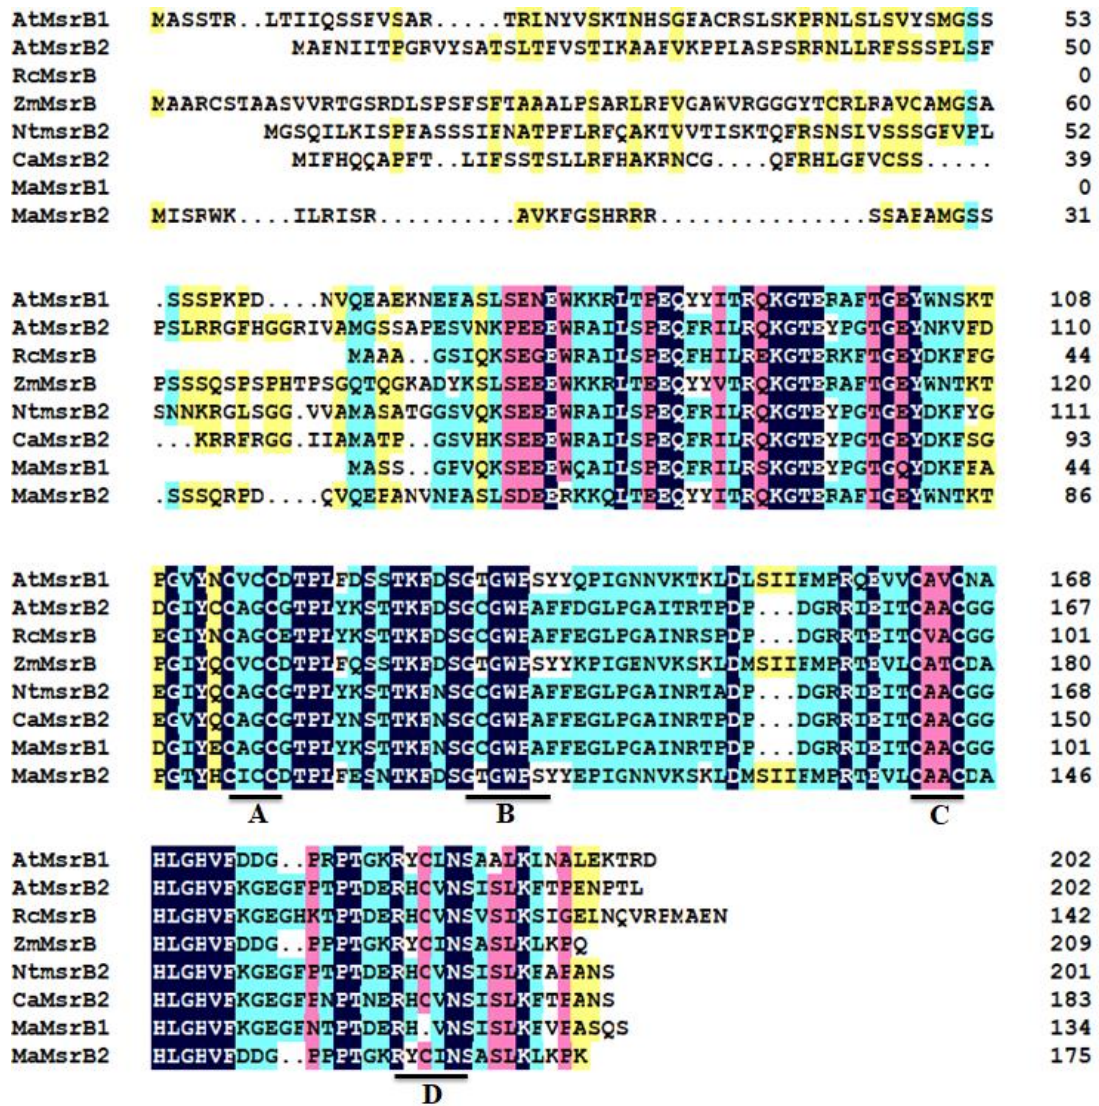

**Figure S5** Multiple alignment of MaMsrB1 and MaMsrB2 with AtMsrB1, AtMsrB2, RcMsrB, ZmMsrB, NtMsrB2 and CaMsrB2. The conserved recycling motifs (B), conserved catalytic domain (D) and the zinc fixation motifs (A and C) are indicated by black lines.

**Table S1** Summary of primers used in this study.

| <b>Gene</b>                                                                  | <b>Forward(5'-3')</b>                                 | <b>Reverse(5'-3')</b>                            |
|------------------------------------------------------------------------------|-------------------------------------------------------|--------------------------------------------------|
| <b>For full length cloning</b>                                               |                                                       |                                                  |
| <i>MaAPX1</i>                                                                | ATGGCGAAGTCGTATCCGACGG<br>TGAGTG                      | TTAAGCCTCAGCAAATCCGAGTT<br>CTGA                  |
| <i>MaMsrB2</i>                                                               | ATGATCAGTCGATGGAAAATCC<br>TCCGC                       | CTACTTCGGCTTCAGCTTTAGGG<br>ATGC                  |
| <b>For qRT-PCR in banana</b>                                                 |                                                       |                                                  |
| <i>MaAPX1</i>                                                                | GGGCTCAACATCGCTGTCAGGC<br>TCTT                        | GGCACCTTCCCAGTGTGTGTCCA<br>CCA                   |
| <i>MaMsrB2</i>                                                               | TCTTTGTGCTGCCTGCGAT                                   | CAGATGTCCGATAGATTTTGTC                           |
| <i>MaActin</i>                                                               | TGGTATGGAAGCCGCTGGTA                                  | TCTGCTGGAATGTGCTGAGG                             |
| <b>For qRT-PCR in Arabidopsis</b>                                            |                                                       |                                                  |
| <i>MaAPX1</i>                                                                | TCTTGTGGAGAAATATGCTGCC                                | TTGGGACAACCTCCAGTGAAA                            |
| <i>AtUBQ</i>                                                                 | GATCTTTGCCGGAAAACAATTG<br>GAGGATGG                    | CGACTTGTCATTAGAAAGAAAG<br>AGATAACA               |
| <b>For overexpression in Arabidopsis</b>                                     |                                                       |                                                  |
| <i>MaAPX1-1302</i>                                                           | GGACTCTTGACCATGGTAATGG<br>CGAAGTCGTATCCGACGGTGA       | GTCAGATCTACCATGGTAGCCTC<br>AGCAAATCCGAGTTCT      |
| <b>For subcellular localization</b>                                          |                                                       |                                                  |
| <i>MaAPX1-GFP</i>                                                            | GGACTCTTGACCATGGTAATGG<br>CGAAGTCGTATCCGACGGTGA       | GTCAGATCTACCATGGTAGCCTC<br>AGCAAATCCGAGTTCT      |
| <i>MaMsrB2-GFP</i>                                                           | GGACTCTTGACCATGGTAATGA<br>TCAGTCGATGGAAAATCCTCCG<br>C | GTCAGATCTACCATGGTCTACTT<br>CGGCTTCAGCTTTAGGGATGC |
| <b>For site-directed mutagenesis of Met residues to glutamine and valine</b> |                                                       |                                                  |
| <i>MaAPX1M36Q</i>                                                            | AACTGTGCCCGTTGCAGCTCC<br>GGCTC                        | GAGCCGGAGCTGCAACGGGGCA<br>CAGTT                  |

*MaAPX1M* AACTGTGCCCCGTTGGTGCTCC GAGCCGGAGCACCAACGGGGCA  
*36V* GGCTC CAGTT

**For BiFC**

*MaAPX1-  
YC* CGCGCCACTAGTGGATCCATGG GGGAGCGGTACCCTCGAGAGCC  
CGAAGTCGTATCCGACGGTGAG TCAGCAAATCCGAGTTCTGA  
TG

*MaAPX1-  
YN* CGCGCCACTAGTGGATCCATGG GGGAGCGGTACCCTCGAGAGCC  
CGAAGTGGACTTGAAGAAGTCG TCAGCAAATCCGAGTTCTGA  
TG

*MaMsrB2-  
YC* CGCGCCACTAGTGGATCCATGA GGGAGCGGTACCCTCGAGCTTC  
TCAGTCGATGGAAAATCCTCCG GGCTTCAGCTTTAGGGATGC  
C

**For Y2H**

*MaAPX1-  
BD* GAGGAGGACCTGCATATGGCGA ACGGATCCCCGGGAATTCTTAA  
AGTCGTATCCGACGGTGAGTG GCCTCAGCAAATCCGAGTTCT

*MaAPX1-  
AD* CCAGATTACGCTCATATGGCGA CCCACCCGGGTGGAATTCTTAA  
AGTCGTATCCGACGGTGAGTG GCCTCAGCAAATCCGAGTTCT

*MaMsrB2-  
AD* CCAGATTACGCTCATATGATGA CCCACCCGGGTGGAATTCCTACT  
TCAGTCGATGGAAAATCCTCCG TCGGCTTCAGCTTTAGGGATGC  
C

*MaMsrB2-  
BD* GAGGAGGACCTGCATATGATGA ACGGATCCCCGGGAATTCCTACT  
TCAGTCGATGGAAAATCCTCCG TCGGCTTCAGCTTTAGGGATGC  
C

**For protein expression**

*MaAPX1-  
His* CCGCGCGGCAGCCATATGGCGA AGTCATGCTAGCCATATGTTAAG  
AGTCGTATCCGACGGTGAG CCTCAGCAAATCCGAGTTCT

*MaMsrB2-  
GST* CTGGTTCCGCGTGGATCCATGA CCGGGAATTCGGGGATCCCTAC  
TCAGTCGATGGAAAATCCTCCG TTCGGCTTCAGCTTTAGGGATGC  
C

---
